1 **Sources of genomic diversity in the self-fertile plant pathogen,**  
2 ***Sclerotinia sclerotiorum*, and consequences for resistance breeding**

3 Short title: *Sclerotinia* genomic and pathogenic diversity

4  
5 Lone Buchwaldt, Harsh Garg<sup>¶1</sup>, Krishna D. Puri<sup>¶2</sup>, Jonathan Durkin, Jennifer Adam, Myrtle  
6 Harrington, Debora Liabeuf<sup>3</sup>, Alan Davies, Dwayne D. Hegedus, Andrew G. Sharpe<sup>4</sup>, Krishna  
7 Kishore Gali<sup>5</sup>

8  
9 <sup>¶</sup>These authors contributed equally to the manuscript

10

11 Corresponding author:

12 Email: Lone.Buchwaldt@Canada.ca

13

14 **Affiliations**

15 LB, HG, JD, JA, MH, AD, DDH: Agriculture and Agri-Food Canada, Saskatoon Research and  
16 Development Centre, 107 Science Place, Saskatoon, Canada, S7N 0X2.

17 <sup>1</sup>Agriculture and Agri-Food Canada, Saskatoon Research and Development Centre, 107  
18 Science Place, Saskatoon, Canada, S7N 0X2.

19 <sup>1</sup> HG: School of Life and Environmental Sciences, the University of Sydney, NSW, Australia.  
20 Email: gharsh81@gmail.com

21 <sup>2</sup> KP: Department of Plant Pathology, University of California, Davis, CA, USA. Email:  
22 kdpuri@ucdavis.edu.

23 <sup>3</sup> DL: Driscoll's, Watsonville, California, USA. Email: Debora.liabeuf@gmail.com

24 <sup>4</sup> AGS: Global Institute for Food Security, University of Saskatchewan, 110 Gymnasium Place,  
25 Saskatoon, SK, Canada, S7N 0W9. Email: Andrew.Sharpe@gifs.ca.

26 <sup>5</sup> KKG: Crop Development Centre, Department of Plant Sciences, University of Saskatchewan,  
27 SK, Canada, S7N 5A8. Email: Kishore.Gali@usask.ca.

28

## 29 **Abstract**

30 The ascomycete, *Sclerotinia sclerotiorum*, has a broad host range and causes yield loss in  
31 dicotyledonous crops world wide. Genomic diversity and aggressiveness were determined in a  
32 population of 127 isolates from individual canola (*Brassica napus*) fields in western Canada.  
33 Genotyping with 39 simple sequence repeat (SSR) markers revealed each isolate was an  
34 unique haplotype. Analysis of molecular variation showed 97% was due to isolate and 3% to  
35 geographical location. Testing of mycelium compatibility identified clones of mutually compatible  
36 isolates, and strings of pairwise compatible isolates not seen before. Importantly, mutually  
37 compatible isolates had similar SSR haplotype, in contrast to high diversity among incompatible  
38 isolates. Isolates from the Province of Manitoba had higher allelic richness and higher mycelium  
39 compatibility (61%) than Alberta (35%) and Saskatchewan (39%). All compatible Manitoba  
40 isolates were interconnected in clones and strings, which can be explained by wetter growing  
41 seasons and more susceptible crops species both favouring more mycelium interaction and life  
42 cycles. Analysis of linkage disequilibrium rejected random recombination, consistent with a self-  
43 fertile fungus and restricted outcrossing due to mycelium incompatibility, and only one meiosis  
44 per lifecycle. More probable sources of genomic diversity is slippage during DNA replication and  
45 point mutation affecting single nucleotides, not withstanding the high mutation rate of SSRs  
46 compared to genes. It seems accumulation of these polymorphisms lead to increasing mycelium  
47 incompatibility in a population over time. A phylogenetic tree grouped isolates into 17 sub-  
48 populations. Aggressiveness was tested by inoculating one isolate from each sub-population  
49 onto *B. napus* lines with quantitative resistance. Results were significant for isolate, line, and  
50 isolate by line interaction. These isolates represent the genomic and pathogenic diversity in

51 western Canada, and are suitable for resistance screening in canola breeding programs. Since  
52 the *S. sclerotiorum* life cycle is universal, conclusions on sources of genomic diversity  
53 extrapolates to populations in other geographical areas and host crops.

54

## 55 **Author summary**

56 *Sclerotinia sclerotiorum* populations from various plant species and geographical areas have  
57 been studied extensively using mycelium compatibility tests and genotyping with a shared set of  
58 6-13 SSR markers published in 2001. Most conclude the pathogen is clonally propagated with  
59 some degree of outcrossing. In the present study, a population of *S. sclerotiorum* isolates from  
60 1.5 million km<sup>2</sup> area in western Canada were tested for mycelium compatibility, and genotyped  
61 with 9 published and 30 newly developed SSR markers targeting all chromosomes in the  
62 dikaryot genome (8+8). A new way of visualizing mycelium compatibility results revealed clones  
63 of mutual compatible isolates, as well as long and short strings of pairwise compatible isolates.  
64 Importantly, clonal isolates had similar SSR haplotype, while incompatible isolates were highly  
65 dissimilar; a relationship difficult to discern previously. Analysis of population structure found a  
66 lack of linkage disequilibrium ruling out random recombination. Outcrossing, a result of  
67 alignment of non-sister chromosomes during meiosis, is unlikely in *S. sclerotiorum*, since  
68 mycelium incompatibility prevents karyogamy, and compatibility only occur between isolates  
69 with similar genomic composition. Instead, genomic diversity comprise transfer of nuclei through  
70 hyphal anastomosis, allelic modifications during cell division and point mutation. Genomic  
71 polymorphisms accumulate over time likely result in gradual divergence of individuals, which  
72 seems to resemble the 'ring-species' concept. We are currently studying whether nuclei in  
73 microconidia might also contribute to diversity. A phylogenetic analysis grouped isolates into 17  
74 sub-populations. One isolate from each sub-population showed different level of aggressiveness  
75 when inoculated onto *B. napus* lines previously determined to have quantitative resistance to a

76 single isolate. Seed of these lines and *S. sclerotiorum* isolates have been transferred to plant  
77 breeders, and can be requested from the corresponding author for breeding purposes.  
78 Quantitative resistance is likely to hold up over time, since the rate of genomic change is  
79 relatively slow in *S. sclerotiorum*.

80

## 81 **Keywords**

82 *Sclerotinia sclerotiorum*, *Brassica napus*, canola, mycelium compatibility, clones, SSR markers,  
83 population structure, outcrossing, aggressiveness, quantitative resistance.

84

## 85 **Introduction**

86 The ascomycete plant pathogen, *Sclerotinia sclerotiorum*, survives in the soil for several years  
87 as sclerotia (resting bodies) consisting of condensed hyphae surrounded by a melanised rind. In  
88 the spring, sclerotia in the top soil layer germinated with apothecia containing ascospores that  
89 are dispersed by wind to surrounding plants. Ascospores are unable to penetrate the plant  
90 epidermis directly. Instead, they germinate with hyphae that colonize dead organic material and  
91 form infection cushions [1]. These provide energy for production of virulence factors, which  
92 enable the pathogen to penetrate the plant epidermis. The fungal hyphae colonize plants  
93 without forming secondary spores, thus, the pathogen only has a single spore generation per  
94 cropping season.

95

96 *Sclerotinia sclerotiorum* is a dikaryot with two nuclei in cells of actively growing hyphal tips and  
97 in each ascospore resulting from one meiotic and one mitotic cell division. In addition, a single  
98 nucleus is found in microconidia, but their role in the lifecycle has not been determined. Hyphal  
99 tips from two different isolates can unite in anastomosis as first demonstrated by Kohn et al. [2].

100 Later, Ford et al. [3] observed transfer of nuclei between anastomosed hyphae using

101 auxotrophic mutants to validate the formation of new dikaryons with restored nutrient  
102 requirements. Paring of two *S. sclerotiorum* isolates on nutrient agar can distinguish between  
103 mycelium compatible isolates that grow as one colony, and isolates that are incompatible  
104 growing as two colonies separated by a line of sparse mycelium. All isolates are self-compatible  
105 when paired with itself. Test of mycelium compatibility can be applied to an entire population  
106 using a isolate by isolate paring matrix. Populations studies comprising *S. sclerotiorum* isolates  
107 from various plant species and geographical areas have used a combination of mycelium  
108 compatibility test, genotyping with molecular markers, and tests for aggressiveness on selected  
109 host lines. A set of simple sequence repeat (SSR) markers was published in 2001 [4], and has  
110 been widely used to genotype *S. sclerotiorum* isolates. Different levels aggressiveness among  
111 isolates inoculated onto various host species have been demonstrated [5, 6, 7]. A summary of  
112 results from numerous studies were reviewed by Petrofeza et al. [8]. Most studies agree *S.*  
113 *sclerotiorum* is clonally propagated with some level of outcrossing. Whether there is a  
114 relationship between isolates belonging to the same mycelium compatible group and their SSR  
115 haplotype has been difficult to discern.

116

117 The pathogen has a wide host range among dicotyledonous plant species including canola  
118 (*Brassica napus*), bean (*Phaseolous vulgaris*), soybean (*Glycine max*), lentil (*Lens culinaris*) and  
119 sunflower (*Helianthus annus*) [9]. Each year around eight million hectares are planted to canola  
120 in the Canadian provinces of Alberta (AB), Saskatchewan (SK) and Manitoba (MB). A high  
121 earning potential for canola seed has led to shortening of crop rotations, which in turn has  
122 resulted in higher disease pressure from *S. sclerotiorum* that causes stem rot also know as  
123 white mould. Infection of canola occur during flowering when the spores grow on fallen petals  
124 and pollen adhering to plant surfaces. The most severe yield loss results from colonisation of  
125 the main stem which restricts vascular transport of water and nutrients to the seed. Stem

126 symptoms consists of long, pale lesions that initially have a dark margin between infected and  
127 healthy tissues. Later, the lesions expand leading to soft and collapsed stems.

128

129 Resistance to *S. sclerotiorum* in *B. napus* as well as other crop species is a quantitative trait that  
130 rely on several defense genes and pathways with cumulative effect [7, 10]. Previously, we  
131 identified *B. napus* lines with quantitative resistance after screening of more than 400  
132 germplasm lines obtained from gene banks worldwide [11]. The phenotyping method involved  
133 attaching mycelium plugs of a pathogen isolate to the main stem of flowering plants, thereby  
134 resembling the natural infection process described above. Germplasm lines were ranked from  
135 resistant to susceptible based on lesion length and percent soft and collapsed stems.

136 Heterogeneity in the disease phenotype was eliminated in a sub-set of lines by repeated cycles  
137 of inoculation, selection of resistant plants, selfing and re-testing, and resulted in high level of  
138 quantitative resistance in four lines, PAK54 and PAK93 originating from Pakistan, DC21 from  
139 South Korea and K22 from Japan. The lines were phenotyped for disease reaction using a  
140 single *S. sclerotiorum* isolate, 321, collected in 1992 from a canola field in Olds, Alberta [12].

141

142 The present research seeks to characterize the genomic and pathogenic diversity in a *S.*  
143 *sclerotiorum* population from commercial canola fields throughout a large production area of  
144 western Canada measuring approximately 1500 kilometers from East to West and 1000  
145 kilometers from North to South. The results have direct application for development of resistant  
146 canola varieties, by providing selected isolates that represent the diversity needed for screening  
147 of breeding lines. Importantly, the study identifies mechanisms leading to this diversity, and  
148 assesses the rate of change in *S. sclerotiorum* populations applicable across geographical  
149 areas and host species.

150

## 151 Results

### 152 Disease incidence and isolate collection

153 A survey of 168 commercial canola fields in 2010 for the incidence of *S. sclerotiorum* showed  
154 the pathogen was present in 88% (Fig 1). In Manitoba, the pathogen was found in all fields with  
155 13% of fields having between 6 and 30% disease incidence (Table 1). In Saskatchewan, 49% of  
156 fields had no or traces of the disease on side branches and pods, while only 4% of fields had  
157 incidences between 6 to 30. In Alberta, all fields had only up to 5% disease incidence. Where  
158 possible four isolations were made from 10 plants per field. The total collection consisted of  
159 1392 individual *S. sclerotiorum* isolates kept as sclerotia in long-term storage under cold and dry  
160 conditions.

161

162 Table 1. Incidence of *S. sclerotiorum* in commercial canola (*B. napus*) fields in three Canadian  
163 provinces.

| Disease incidence      | Alberta | Saskatchewan | Manitoba |
|------------------------|---------|--------------|----------|
| 0                      | 0       | 19           | 0        |
| Trace                  | 6       | 19           | 0        |
| 1%                     | 15      | 24           | 25       |
| 2-5%                   | 10      | 12           | 27       |
| 6-10%                  | 0       | 2            | 2        |
| 11-20%                 | 0       | 0            | 3        |
| 21-30%                 | 0       | 1            | 3        |
| Total number of fields | 31      | 77           | 60       |

164

165

166

## 167 **Mycelium compatibility relationships**

168 A total of 133 *S. sclerotiorum* isolates from individual canola fields, as well as 36 isolates from a  
169 single heavily infected field in Saskatchewan, were tested for mycelium compatibility on PDA  
170 media in a replicated test for a total of 7734 isolate pairings. Each isolate paired with itself in all  
171 cases by forming a single colony, thus confirming they were self-compatible. Isolates that were  
172 compatible with at least one other isolate within the same province comprised 61% in Manitoba,  
173 39% in Alberta and 35% in Saskatchewan. For comparison, 41% were compatible within a  
174 single Saskatchewan field, while only 11% of isolates from different provinces were compatible  
175 (S1 Table).

176  
177 Diagrams were created to visualize the relationship among compatible isolates in each isolate x  
178 isolate pairing matrix by province, inter-province and in a single field as shown in Figs 2 and 3  
179 (S1 Table). Circles specify groups of mutually compatible isolates belonging to the same clone,  
180 while arrows specify compatibility between pairs of isolates. Some isolates formed short and  
181 long strings where neighbouring isolates were compatible, but other isolates along the string  
182 were incompatible. Interestingly, all compatible isolates from Manitoba were closely related  
183 either as members of clones (A, B and C) or strings (Fig 2). Some of the longest strings  
184 consisted of 10 isolates, such as MB27-MB26-MB51-MB22-MB24-MB49-MB30-MB6-MB38-  
185 MB19. Compatible isolates in Saskatchewan were not as closely related forming only one clone  
186 and six pairs of compatible isolates, but no strings (Fig 3). It is striking that mycelium  
187 compatibility among isolates from 18 different canola fields in Saskatchewan closely resembled  
188 compatibility of 15 isolates from a single field in the same province, both having a single clone  
189 and five or six pairs of compatible isolates (Fig 3). Isolates in Alberta were not closely related,  
190 since neither clones nor strings were identified. When isolates from different provinces were  
191 paired, only the older isolate, 321, collected in 1992 from Alberta, was compatible with MB29  
192 from Manitoba.



193

## 194 **Simple sequence repeat polymorphisms**

195 The sequenced *S. sclerotiorum* genome [13] was used to design 37 primer pairs for  
196 amplification of simple sequence repeats (SSR), so that 15 chromosomes and one contig were  
197 represented (labelled AAFC). Another 15 SSR were selected from the literature, (labelled ssr)  
198 [4]. A subset of 39 SSR (30 AAFC and 9 ssr) provided high quality amplification products, and  
199 were used to genotype 127 *S. sclerotiorum* isolates collected in individual fields (Table 2). The  
200 resulting scoring matrix consisted of 396 polymorphic alleles. Each SSR primer pair amplified  
201 between 2 and 35 alleles, of which 75% were shared by two or more isolates, while the  
202 remaining 25% were private alleles present in only one isolate. The values for polymorphic  
203 information content (PIC) and genomic diversity ( $H$ ) for each SSR marker were highly correlated  
204 ( $r = 0.99$ ) and ranged from 0.126 to 0.949 and 0.136 to 0.959, respectively (Table 2). The PIC  
205 value was above 0.5 for 81% (26) of the AAFC markers. The following markers on 12  
206 chromosomes were particularly informative since they each amplified a highly polymorphic locus  
207 shared by many isolates: AAFC-2d on chromosome 1, AAFC-22c on chromosome 2, AAFC-3c  
208 on chromosome 4, AAFC-7b on chromosome 5, AAFC-9b on chromosome 6, AAFC-6f on  
209 chromosome 7, AAFC-11a on chromosome 9, AAFC-20b on chromosome 11, AAFC-33d on  
210 chromosome 12, AAFC-12a on chromosome 13, AAFC-25d on chromosome 14, AAFC-15e on  
211 chromosome 15, and AAFC-4d on contig R.

212

213 Table 2. Information on simple sequence repeat (SSR) markers used for genotyping of *S.*  
214 *sclerotiorum* isolates organized by chromosome. Markers with AAFC-prefix were developed in  
215 this study, while markers with ssr-prefix were published by [4].

216

| Chr | Primer    | Repeat motif              | Fragment size, bp** | Total alleles | Shared alleles | Private alleles | PIC   | Genomic diversity <i>H</i> |
|-----|-----------|---------------------------|---------------------|---------------|----------------|-----------------|-------|----------------------------|
| 1   | AAFC-2d*  | (GAAAG)15                 | 344-451             | 18            | 12             | 6               | 0.838 | 0.860                      |
|     | AAFC-2b   | (AG)21                    | 262-315             | 12            | 10             | 2               | 0.790 | 0.817                      |
| 2   | AAFC-5e*  | (TACA)10                  | 249-265             | 5             | 5              | 0               | 0.648 | 0.706                      |
|     | AAFC-22a  | (CTT)16                   | 387-411             | 5             | 4              | 1               | 0.652 | 0.709                      |
|     | AAFC-22c  | (TCTTCA)26                | 209-494             | 35            | 20             | 15              | 0.923 | 0.936                      |
|     | AAFC-22e  | (ACCT)21                  | 285-385             | 5             | 3              | 2               | 0.389 | 0.460                      |
|     | AAFC-22f  | (GT)18                    | 181-192             | 4             | 4              | 0               | 0.637 | 0.700                      |
|     | AAFC-23b  | (TTG)9(GTG)6              | 378-387             | 4             | 4              | 0               | 0.457 | 0.549                      |
| 3   | AAFC-24c  | (AG)9(GT)8                | 366-373             | 3             | 3              | 0               | 0.243 | 0.268                      |
|     | AAFC-24e  | (AAAAGC)23                | 238-479             | 14            | 3              | 11              | 0.254 | 0.259                      |
|     | ssr 5-2   | (GT)8                     | 335-338             | 2             | 2              | 0               | 0.126 | 0.136                      |
|     | ssr 20-3  | (GT)7GG(GT)5              | 295-297             | 2             | 2              | 0               | 0.266 | 0.319                      |
|     | ssr 9-2   | (CA)9(CT)9                | 376-381             | 3             | 3              | 0               | 0.272 | 0.304                      |
| 4   | AAFC-3c*  | (AGAT)14                  | 286-310             | 6             | 6              | 0               | 0.647 | 0.690                      |
|     | ssr 7-2   | (GA)14                    | 187-191             | 3             | 3              | 0               | 0.407 | 0.493                      |
|     | ssr 17-3  | (TTA)9                    | 357-381             | 5             | 4              | 1               | 0.446 | 0.500                      |
|     | ssr 114-4 | (AGAT)14(AAGC)4           | 369-393             | 6             | 6              | 0               | 0.649 | 0.692                      |
| 5   | AAFC-7b*  | (ACATA)6(TATT)9           | 352-449             | 10            | 4              | 6               | 0.526 | 0.607                      |
|     | ssr 12-2  | (CA)9                     | 233-240             | 3             | 3              | 0               | 0.559 | 0.636                      |
|     |           | [(GT)2GAT]3(GT)14         |                     |               |                |                 |       |                            |
|     | ssr 5-3   | GAT(GT)5[GAT(GT)4]3(GAT)3 | 312-355             | 5             | 5              | 0               | 0.631 | 0.690                      |
|     | ssr 7-3   | GT10                      | 225-231             | 3             | 3              | 0               | 0.559 | 0.636                      |
| 6   | AAFC-9b*  | (AATGAA)25                | 261-409             | 24            | 19             | 5               | 0.935 | 0.946                      |
|     | AAFC-9d   | (GATATT)13                | 319-470             | 17            | 15             | 2               | 0.737 | 0.757                      |

|    |           |                                |         |    |    |    |       |       |
|----|-----------|--------------------------------|---------|----|----|----|-------|-------|
|    | AAFC-21a  | (GGTAGT)8                      | 403-427 | 5  | 4  | 1  | 0.599 | 0.669 |
|    | AAFC-21d  | (CAGA)9(CAGG)8                 | 392-423 | 8  | 7  | 1  | 0.761 | 0.797 |
|    | AAFC-21e  | (CAA)13                        | 384-401 | 3  | 3  | 0  | 0.407 | 0.456 |
|    | ssr 36-4  | CA6(CGCA)2CAT2                 | 431-437 | 2  | 2  | 0  | 0.245 | 0.289 |
|    | ssr 110-4 | (TATG)9                        | 384-399 | 4  | 3  | 1  | 0.536 | 0.607 |
| 7  | AAFC-6f*  | (TGT)9                         | 306-337 | 6  | 5  | 1  | 0.672 | 0.728 |
| 9  | AAFC-11a* | (CTCCTT)14                     | 282-434 | 17 | 12 | 5  | 0.823 | 0.848 |
|    | AAFC-27b  | (AGTTG)18                      | 328-419 | 10 | 7  | 3  | 0.721 | 0.761 |
|    | ssr 119-4 | (GTAT)6 and<br>(TACA)5         | 386-390 | 2  | 2  | 0  | 0.306 | 0.380 |
| 10 | ssr 6-2   | (TTTTTC)2(TTTTT<br>G)2(TTTTTC) | 496-504 | 2  | 2  | 0  | 0.345 | 0.446 |
| 11 | AAFC-20b* | (TCT)19                        | 378-543 | 23 | 13 | 10 | 0.846 | 0.866 |
|    | AAFC-20d  | (TG)19                         | 288-307 | 6  | 6  | 0  | 0.674 | 0.727 |
|    | ssr 8-3   | CA12                           | 267-271 | 3  | 3  | 0  | 0.400 | 0.481 |
| 12 | AAFC-33d* | (GTAG)11                       | 226-234 | 3  | 3  | 0  | 0.591 | 0.670 |
| 13 | AAFC-12a* | (GTAT)27                       | 325-428 | 14 | 9  | 5  | 0.772 | 0.805 |
|    | AAFC-12b  | (CATC)18                       | 338-381 | 6  | 5  | 1  | 0.570 | 0.629 |
|    | AAFC-26b  | (TCCATT)23                     | 188-432 | 27 | 18 | 9  | 0.916 | 0.929 |
| 14 | AAFC-25b* | (TTATAT)23                     | 203-274 | 5  | 5  | 0  | 0.496 | 0.535 |
|    | AAFC-25d  | (TACAA)24                      | 341-483 | 20 | 14 | 6  | 0.815 | 0.837 |
|    | AAFC-25e  | (GTAT)20                       | 321-390 | 11 | 10 | 1  | 0.813 | 0.840 |
| 15 | AAFC-15e* | (AAATA)28                      | 342-552 | 34 | 25 | 9  | 0.949 | 0.959 |
| R  | AAFC-4d*  | (ATTAT)34                      | 288-479 | 30 | 24 | 6  | 0.944 | 0.955 |
|    | AAFC-18a  | (AC)13                         | 359-361 | 2  | 2  | 0  | 0.330 | 0.421 |
| na | ssr 55-4  | TACA10                         | 175-221 | 9  | 5  | 4  | 0.631 | 0.685 |

217

218 \* The most informative markers with high PIC value and high number of shared alleles among isolates.

219 \*\* Fragment sizes include a 18 bp M13 tail sequence.

220

## 221 **Effect of geographic location**

222 When SSR data from *S. sclerotiorum* isolates were grouped by province, analysis of molecular  
223 variance (AMOVA) showed 97% of the genomic variation was explained by differences among  
224 isolates, while 3% was due to differences among provinces ( $P = 0.001$ ) (Table 3). Other  
225 analysis also showed the effect of geographical location. Isolates in Manitoba had the highest  
226 allelic richness (6.02) and the highest number of private alleles (1.25) compared to isolates in  
227 Saskatchewan and Alberta (Table 4). As expected, the genomic distance ( $D$ ) between *S.*  
228 *sclerotiorum* populations was higher between the two distant provinces, Alberta and Manitoba  
229 ( $D = 0.098$ ) (Fig 1), than between neighbouring provinces Saskatchewan and Manitoba ( $D =$   
230  $0.017$ ) and Saskatchewan and Alberta ( $D = 0.05$ ) (Table 5). Congruently, gene flow ( $Nm$ ) was  
231 highest between neighbouring provinces Manitoba and Saskatchewan ( $Nm = 53.97$ ), followed  
232 by Saskatchewan and Alberta, and the lowest gene flow occurred between the two most distant  
233 provinces, Alberta and Manitoba. The differentiation index ( $PhiPT$ ) was not significant between  
234 the neighbouring provinces Manitoba and Saskatchewan, but was significantly different between  
235 both Saskatchewan and Alberta, as well as between Manitoba and Alberta (Table 5).

236

237 Table 3. Analysis of molecular variance (AMOVA) based on simple sequence repeat markers in  
238 127 *S. sclerotiorum* isolates from commercial canola fields in three Canadian provinces, Alberta,  
239 Saskatchewan and Manitoba ( $P = 0.001$ ).

| 240 | Province     | Allelic richness | Private allelic richness |
|-----|--------------|------------------|--------------------------|
| 241 | Manitoba     | 6.02 ± 0.63      | 1.25 ± 0.22              |
| 242 | Saskatchewan | 5.66 ± 0.62      | 0.82 ± 0.17              |
| 243 | Alberta      | 3.95 ± 0.32      | 0.85 ± 0.18              |

244

245

247 Table 4. Analysis of allelic richness among *S. sclerotiorum* isolates from three Canadian  
 248 provinces.

| 249 | Source of       | Df  | Mean    | Estimated | % of total |
|-----|-----------------|-----|---------|-----------|------------|
| 250 | variation       |     | squares | variance  | variation  |
| 251 | Provinces       | 2   | 35.3    | 0.5       | 3          |
| 252 | Isolates within |     |         |           |            |
| 253 | Provinces       | 126 | 15.3    | 15.3      | 97         |

254

255

256 Table 5. Analysis of gene flow ( $N_m$ ), genetic distance ( $D$ ) and population genetic differentiation  
 257 ( $\Phi_{IPT}$ ) among *S. sclerotiorum* isolates collected in three Canadian provinces.

258

| 259 | Provinces               | $N_m$ | $D$   | $\Phi_{IPT}$ |
|-----|-------------------------|-------|-------|--------------|
| 260 | Manitoba - Saskatchewan | 53.97 | 0.017 | 0.009 ns     |
| 261 | Saskatchewan - Alberta  | 13.42 | 0.050 | 0.036**      |
| 262 | Manitoba - Alberta      | 7.87  | 0.098 | 0.060***     |

263

264

### 265 Test of random recombination

266 Analysis of linkage disequilibrium in *S. sclerotiorum* assessed both by province and combined  
 267 for the three provinces showed the Index of association ( $I_A$ ) was statistically significant in all  
 268 cases, thereby rejecting the null hypothesis of random recombination. Also, all standard index of  
 269 associations ( $r_{BarD}$ ) were much closer to 0 than to 1 specifying non-random association (Table

270 6). Thus, genomic variation based on SSR polymorphisms is less likely a result of random  
271 recombination in the ascospore stage, but rather through other mechanisms as discussed later.

272

273 Table 6. Analysis of linkage disequilibrium (*LD*) among *S. sclerotiorum* isolates from three  
274 Canadian provinces resulting in an index of association ( $I_A$ ) and a standardized index of  
275 association ( $rBarD$ ).

276

278

| Province     | $I_A$  | $rBarD$ |
|--------------|--------|---------|
| Manitoba     | 3.09** | 0.0685  |
| Saskatchewan | 4.36** | 0.0960  |
| Alberta      | 2.78** | 0.0621  |
| Combined     | 2.97** | 0.0654  |

279

280

281

282

283

## 284 **Population structure**

285 Analysis of *S. sclerotiorum* population structure showed relatively high Delta K values  
286 supporting the existence of either 2, 12, 17 or 20 sub-populations (Fig 4). Existence of two sub-  
287 populations were highly significant with 63% of isolates in Q1 (25 isolates from AB, 28 from SK,  
288 and 28 from MB), 33% in Q2 (2 isolates from AB, 16 from SK, and 23 from MB), and 4% in an  
289 admix group (isolates MB18, MB27, MB24, MB35 and SK55) (S1 Table). Evidently,  
290 Saskatchewan and Manitoba isolates were almost equally represented in Q1 and Q2, but  
291 skewed towards Q1 in Alberta. Additional analysis of genomic distance among isolates  
292 visualized as a phylogenetic tree resulted in a multitude of possible sub-populations. Based on  
293 the results from these two types of analyses, it was decided 17 sub-populations best captured  
294 the genomic diversity, since Delta K was lower for 12 sub-populations, while 20 sub-populations  
295 did not add more clarity. The 17 sub-populations consisted of 1 to 22 isolates marked as  
296 alternate red and blue groups in Fig 5. One isolate from each sub-population was selected to

297 represent the genomic diversity of the *S. sclerotiorum* population in western Canada, and they  
298 were subsequently evaluated for aggressiveness on *B. napus*.

299

### 300 **Isolate aggressiveness**

301 The 17 *S. sclerotiorum* isolates were inoculated onto six *B. napus* lines separately. Disease  
302 progression was measured at weekly intervals as lengthwise colonisation of the stem and depth  
303 of penetration into the stem tissue measured as soft + collapsed lesions. Lesion length at each  
304 of three rating dates and the area under the disease progress curve (AUDPC) were highly  
305 correlated. Lengthwise lesion growth also was correlated with depth of penetration (S2 Table).  
306 Thus for simplicity, only the results from stem lesion length measured 21 days after inoculation  
307 are reported here. Analysis of variance (ANOVA) was significant for both *S. sclerotiorum* isolate  
308 and *B. napus* line. The lesion length for each isolate across six *B. napus* lines showed a  
309 continuum from the least aggressive isolate AB7 ( $17.4 \pm 3.2$  mm) to the most aggressive isolate  
310 AB29 ( $151.3 \pm 13.8$  mm) (S3 Table). Correspondingly, the lesion length on each *B. napus* line  
311 across 17 isolates ranged from the highest level of quantitative resistance in PAK54 ( $48.3 + 3.2$   
312 mm) to susceptibility in Topas ( $161.2 + 6.6$  mm) (S4 Table). Lines could be divided into four  
313 groups based on LSD values with PAK54 most resistant followed by PAK93 and K22, then  
314 DC21 and Tanto. Interestingly, isolate by line interaction was significant (Table 7), which was  
315 particularly evident when stem lesion length for each *S. sclerotiorum* isolate was graphed for the  
316 six *B. napus* lines separately (Fig 6); this graph shows similar ranking of isolates from low to  
317 high aggressiveness on all *B. napus* lines, except isolate SK35, which was more aggressive on  
318 K22 and DC21 than on PAK54 and PAK93 (S5 Table).

319

320 Table 7. Analysis of variance of six *B. napus* lines, DC21, K22, PAK54, PAK93, Tanto and  
321 Topas, inoculation with 17 *S. sclerotiorum* isolates measured as stem lesion length 21 days  
322 after inoculation.

|     | Source of variation             | Df | Mean squares | F-value | P-value |
|-----|---------------------------------|----|--------------|---------|---------|
| 324 | <i>B. napus</i> lines           | 5  | 107077.1     | 88.9    | 0.001   |
| 325 | <i>S. sclerotiorum</i> isolates | 16 | 25818.1      | 21.4    | 0.001   |
| 326 | Replications                    | 3  | 3664.8       | 3.04    | 0.029   |
| 327 | Lines x isolates                | 80 | 2831.1       | 2.4     | 0.001   |

328

329

## 330 Discussion

331 Effective genotyping of *S. sclerotiorum* isolates from canola in a large geographical area  
332 combined with a new way of visualizing mycelium compatibility relationships gave us an  
333 informative ‘snap-shot’ of the pathogen population in western Canada. The sequenced *S.*  
334 *sclerotiorum* genome [13] was utilized to design SSR markers, and fluorescent capillary  
335 electrophoresis allowed detection of single basepair size differences at 39 SSR loci distributed  
336 over the fungal genome. The resulting SSR polymorphisms were used to determine the relative  
337 contribution of isolates and geographical location to genomic diversity, linkage disequilibrium,  
338 population structure, and phylogenetic relationships among isolates.

339

340 *Sclerotinia sclerotiorum* has two nuclei in each ascospore and in cells of actively growing hyphal  
341 tips [14], while older and less organized mycelium contain myriads of nuclei. The two nuclei  
342 functions as a dikaryon for most of the pathogen’s life cycle, except for a brief phase during  
343 meiosis, when the 16 chromosomes condense into eight structures [15], providing an  
344 opportunity for genomic recombination. New allele combinations during meiosis are created by  
345 alignment of non-homologous chromosomes, followed by crossover events, whereby  
346 DNA strands break and re-join resulting in progenies with a genomic combination different from  
347 the parents. Since non-homologous recombination involve two genetically different nuclei, it



348 occur at a low frequency in *S. sclerotiorum* for the following reasons; (1) meiosis takes place  
349 only once during the pathogen's life cycle often corresponding to a single cropping season; (2)  
350 since the pathogen is homothallic, having both mating type genes at the same locus, it readily  
351 produce ascospores by self-fertilization, which out-competes other propagation scenarios; and  
352 (3) mycelium incompatibility prevent karyogamy between two different nuclei, while mycelium  
353 compatibility occur between genetically similar isolates.

354

355 Microconidia contain a single nucleus and a few organelles [16], and are found intermittently  
356 within mycelium and on the surface of sclerotia. Although the function of microconidia has not  
357 been determined, it is conceivably that these nuclei could transfer to hyphal tips during  
358 formation of asci, which takes place just below the melanised rind of the sclerotium [17]. In the  
359 event that nuclei in microconidia are genetically different from nuclei in the sclerotium, mixing of  
360 nuclei followed by non-homologous recombination is a slight possibility. Eskin [18] identified a  
361 morphological trait in a single *S. sclerotiorum* isolate having 5% of asci with four small and four  
362 larger ascospores. This size dimorphism might result from of mixing of different nuclei affecting  
363 some asci. However, in the present study, analysis of linkage disequilibrium rejected the  
364 hypothesis of random recombination in *S. sclerotiorum*, leading us to conclude non-homologous  
365 recombination is absent or extremely rare in the fungal population in western Canada.

366

367 Significant discoveries were made using diagrams visualizing the relationship among mycelium  
368 compatible isolates. Some *S. sclerotiorum* isolates were connected in strings where 'X' was  
369 compatible with 'Y', and 'Y' with 'Z', while 'X' was incompatible with 'Z', which resembled the  
370 'ring-species' concept most often described for bird species (19). Most significantly, the five and  
371 six mutually compatible isolates in clone A and D (Figs 2 and 3) had almost identical SSR  
372 haplotype, and also belonged to a single sub-population 2 and 4, respectively (Fig 6)  
373 demonstrating they were closely related. Clones with fewer isolates, and isolates forming strings

374 and pairs, belonged to several different sub-populations. In contrast, there were no similarity  
375 between SSR haplotype among the remaining incompatible isolates, which had numerous  
376 private alleles. The most likely sources of genomic diversity in *S. sclerotiorum* documented in  
377 this study consist of slippage during DNA replication and point mutation affecting individual  
378 nucleotides. Both mechanisms are particularly frequent in simple sequence repeats and  
379 accumulate with each mitotic cell division. The dataset seems to have captured isolates at  
380 various stages of divergence. Beginning with clonal isolates with similar SSR haplotypes,  
381 followed by stepwise divergence into compatible isolates forming strings, pairs of compatible  
382 isolates, and ending with incompatible isolates with unique SSR haplotypes. It is conceivable  
383 that genetic information passes from one mycelium compatible isolate to another by hyphal  
384 anastomosis, but over time, certain genetic factors prevent further compatibility, after which  
385 isolates become distinct haplotypes where polymorphisms continue to accumulate. In addition, it  
386 was clear that physical separation contributed to divergence, seen as low (11%) mycelium  
387 compatibility between isolates from different Provinces compared to 35-61% compatibility  
388 between isolates within Provinces.

389  
390 Counts of shared and private alleles demonstrated each *S. sclerotiorum* isolates was a unique  
391 haplotype. This finding seems to contrast most previous publications, where haplotype  
392 frequencies were comparatively lower, but can be explained by the use of fewer SSR markers in  
393 those studies. Like us, these researchers used different sub-sets of markers published by  
394 Sirjusingh and Kohn in 2001 [4] to genotype *S. sclerotiorum* isolates from various plant species  
395 and geographic locations such as 6 SSR [20], 8 SSR [6, 21, 22, 23], 10 SSR [24], 11 SSR [25,  
396 26], 12 SSR [27], and 13 SSR [28]. Understandably, using only 6 to 13 SSR markers limits the  
397 number of polymorphic alleles that can be detected, and consequently, pathogen populations  
398 are seen to comprise isolates with the same haplotype.

399

400 Although dividing isolates into Provinces seemed artificial at first, interpretation of mycelium  
401 compatibility and genomic diversity appeared to fit regional differences regarding crop rotation  
402 and weather conditions. Manitoba isolates had the highest allelic richness and private allelic  
403 richness, and also the highest proportion of mycelium compatible isolates (61%), all of which  
404 were related to one another in clones and strings (Fig 2). The fact that a high percentage of  
405 arable land in Manitoba is occupied by several susceptible crop species, canola, bean, soybean  
406 and sunflower (S6 Figure), compared to a lower percentage only occupied by canola in Alberta,  
407 together with higher frequency of wet weather conditions in Manitoba, has resulted in greater  
408 number of pathogen life cycles in both time and space, and therefore more opportunities for  
409 mycelium interaction among isolates in this province. Crop rotation and weather conditions in  
410 Saskatchewan fall between these two opposites. The results from the survey of *S. sclerotiorum*  
411 disease incidence in 2010 confirm these provincial differences (Table 1). The gene flow  
412 measured between provinces can be explained by planting of sclerotia-contaminated seed  
413 originating from other geographical areas, and infection from wind borne ascospores from  
414 distant fields both resulting in introduction of new haplotypes.

415  
416 Analysis of population structure clearly divided the isolates into two sub-populations with 63% of  
417 isolates in Q1, 33% in Q2 and 4% in an admix group (S7 Table). Analysis of genetic distance  
418 visualized as a phylogenetic tree showed isolates could be further divided into 17 sub-  
419 populations. The two types of analysis were mostly in agreement, since the majority of isolates  
420 in each sub-population belonged to either Q1 or Q2 (Fig 5).

421  
422 Genotyping of isolates collected from all canola producing areas of western Canada allowed  
423 selection of a practical number of genetically diverse isolates for subsequent evaluation of  
424 aggressiveness. Isolates ranked from low to high aggressiveness when inoculated onto a set of  
425 five *B. napus* lines with quantitative resistance, PAK54, PAK93, DC21, K22 and Tanto, based

426 on stem symptoms which is the yield limiting factor. Moreover, the isolate by line interaction was  
427 statistically significant, particularly evident for isolate SK35, which was more aggressive on  
428 DC21 or K22 than on PAK54 or PAK93 (Fig 6); interestingly, this isolate also had the most  
429 unique SSR haplotype (Fig 5). Similar specialization of *S. sclerotiorum* on host genotypes has  
430 been reported in several crop species including *B. napus* and *B. juncea* [5, 7], soybean [29],  
431 bean [30, 23], sunflower [31] and lentil [33]. Isolate MB51, collected in Lilyfield, Manitoba, and  
432 AB29, collected in Cayley, Alberta, were among the most aggressive isolates and also  
433 represented the two largest sub-populations of 22 and 19 isolates, respectively. These isolates  
434 would therefore be suitable for resistance screening during development of varieties destined  
435 for production in western Canada. The two *B. napus* lines, PAK54 and PAK93, which were  
436 partially resistant to a single isolate in a previous study [11], showed a high level of resistance  
437 against all isolates in the present study (Fig 6 and S5 Table). These lines showed quantitative  
438 resistance when evaluated against Australian isolates [33]. We are currently developing pre-  
439 breeding lines from PAK54 and PAK93 that combine sclerotinia resistance with good agronomic  
440 traits, and appropriate seed characteristics including high oil, low glucosinolate and erucic acid.

441  
442 It is well known, *S. sclerotiorum* ascospores are unable to infect intact plant tissue, but first  
443 require uptake of nutrients from dead organic material in order to form infection cushions  
444 containing hundreds of hyphal tips, which in turn are capable of penetrating the plant's  
445 epidermis [34]. Badet et al. [35] found *S. sclerotiorum* has undergone selective pressure toward  
446 optimization of a plethora of metabolites making it a generalist able to infect a wide range of  
447 dicot plant species, in contrast to specialized plant pathogens, such as *Zymoseptoria tritici*  
448 (causing septoria leaf blotch in wheat), which infects the host directly. Derbyshire et al. [36]  
449 concluded *S. sclerotiorum* has undergone a slow rate of evolution based on a low decay of  
450 linkage disequilibrium and a lack of selective sweeps in the genome, a process through which a  
451 new advantageous trait increases in a population that also can lead to reduced genetic variation

452 in surrounding nucleotides. The latter investigation included five isolates, SK35, 321, MB52,  
453 MB21 and AB2, also part of the present study. Taken together, *S. sclerotiorum* is a relative  
454 weak and unspecialized pathogen that rely on secondary metabolites in the infection phase. It is  
455 therefore unlikely changes in aggressiveness in the pathogen population will overcome  
456 quantitative resistance in new varieties since the primary source of genomic variation is slippage  
457 during DNA replication and point mutation, while the probability of non-homologous  
458 recombination is low. Still, it is prudent to evaluate crop varieties against *S. sclerotiorum* isolates  
459 that are representative of the genomic and pathogenic diversity in the area where they will be  
460 planted.

461

## 462 **Materials and methods**

### 463 **Collection of isolates and disease survey**

464 In 2010, commercial canola fields were surveyed for the presence of *S. sclerotiorum* in all  
465 important canola producing areas of Alberta, Saskatchewan and Manitoba. A total of 168 fields  
466 were selected at random separated by at least 25 kilometers (Fig 1). The longitude and latitude  
467 of each location were recorded using a Global Positioning System (TomTom, Netherlands) (S7  
468 Table). The incidence of *S. sclerotiorum* in each field was determined by counting the number of  
469 plants with typical stem rot lesions in a row of 10 plants at five sites (N = 50) separated by at  
470 least 10 meters (Table 1). Fields where only a few plants had lesions on leaves, side-branches  
471 or pods were rated as 'trace'.

472

473 Sclerotinia-infected plants were present in 88% (149) of the fields. Isolates were made from 28  
474 fields in Alberta, 53 in Saskatchewan and 55 in Manitoba for a total of 136 fields. In each field,  
475 infected stems were collected at ten sites separated by at least 10 meters for subsequent  
476 isolation of the pathogen. In addition, 200 infected stems were collected in a single field in

477 Saskatchewan with 30% disease incidence. Four isolations were made from each plant, either  
478 from sclerotia in the stem pith or from infected stem tissue. The isolates were labelled with the  
479 acronym of the province (AB, SK or MB) a field number and the letters a, b, c or d. The sclerotia  
480 and stem pieces were surface-sterilized in 0.6% sodium hypochlorite for three minutes, rinsed in  
481 sterile water and plated on potato dextrose agar (PDA, Difco, Sigma-Aldrich, USA) in 9 cm Petri  
482 plates. Cultures were incubated in a cycle of 16 h day ( $22 \pm 1^\circ\text{C}$ ) and 8 h night ( $18 \pm 1^\circ\text{C}$ ), and  
483 after three to four days hyphal tips from the edge of a growing colony were transferred to a new  
484 PDA plate and incubated as before. Sclerotia that formed along the edge of the Petri plates  
485 were collected after four to six weeks and stored in paper envelopes under dark and dry  
486 conditions at  $4^\circ\text{C}$  with an identical set at  $-10^\circ\text{C}$ . Examination of mycelium compatibility (MC),  
487 genotyping and testing for aggressiveness were conducted with isolates labeled 'a'.

488

### 489 **Mycelium compatibility tests**

490 Mycelium compatibility in *S. sclerotiorum* was examined using 133 isolates representing 28  
491 fields in Alberta, 51 in Saskatchewan and 54 in Manitoba. Isolate 321 collected in 1992 from a  
492 canola field in Olds was part of the Alberta group [12]. In addition, 36 isolates were selected to  
493 represent a single, heavily infected field in Saskatchewan. Sclerotia of each isolate were surface  
494 sterilized, plated on PDA and incubated in a cycle of 16 h day ( $22 \pm 1^\circ\text{C}$ ) and 8 h night ( $18 \pm 1^\circ\text{C}$ ).  
495 After 5-7 days, 4 mm plugs were cut from the growing margin of each culture. One mycelium  
496 plug of two different isolates were placed 3.5 cm apart in a 9 cm Petri plate on PDA  
497 supplemented with 75  $\mu\text{L}$  McCormick's red food coloring and incubated in the dark at  $22 \pm 1^\circ\text{C}$   
498 as described by Schafer and Kohn [37]. Each isolate was paired with itself as a control of self-  
499 compatibility. In the first round, all isolates within each province, and those within the single,  
500 heavily infected field, were paired in all possible combinations for a total of  $n(n-1)/2$  pairings,  
501 where  $n$  is the number of isolates in each group. In the second round, mycelial compatibility was  
502 examined between provinces by pairing 18 isolates against each other representing 3 fields in

503 Alberta, 7 in Saskatchewan and 8 in Manitoba. All pairings in both the first and second rounds  
504 were carried out twice. A compatible interaction showed continuous mycelium growth over the  
505 entire Petri plate. In contrast, an incompatible interaction showed a barrage zone of sparse  
506 mycelium between the two isolates often with a red line in the media, that was particularly  
507 evident on the reverse side of the Petri plate. Plates were examined visually after 7 and 14 days  
508 and scored as + or - on the day the interaction type was most evident. Initially, the data were  
509 entered in a traditional isolate by isolate scoring matrix (S2 Table). Subsequently, diagrams  
510 were created to visualize all compatible interactions by province, inter-provinces and in a single  
511 field as shown in Fig 2 and 3.

512

### 513 **Genotyping**

514 Simple sequence repeats were identified in the sequenced *S. sclerotiorum* genome available on  
515 the Broad Institute's web site [13]. A total of 32 SSRs were selected to represent 15  
516 chromosomes and one contig predicted in this assembly and given the prefix AAFC (Table S8).  
517 Primer pairs for PCR amplification of these SSRs were designed using WebSat software [38]. In  
518 addition, 15 primer pairs for amplification of other *S. sclerotiorum* SSRs were obtained from  
519 Sirjusingh and Kohn [4] and given the prefix *ssr* (Table S8). Genotyping was carried out with *S.*  
520 *sclerotiorum* isolates from group 'a' described above. In preparation for extraction of genomic  
521 DNA, sclerotia of each isolate was surface sterilized, cut in half and placed on PDA in a 9 cm  
522 Petri plate. After 5-7 days incubation at 16 h light (22±1°C) and 8 h dark (18 ±1°C) two 4 mm  
523 plugs were cut from the growing margin and transferred to potato dextrose broth in a 9 cm Petri  
524 plate and incubated as before. When mycelium covered 80% of the liquid surface it was  
525 harvested, washed twice with sterilized, distilled water and lyophilized.

526

527 Total genomic DNA was extracted from 30 mg ground mycelium using a DNA isolation kit  
528 according to the manufacturer's protocol (Norgen Biotek Corp, ON, Canada). DNA was

529 quantified using a Quant-it PicoGreen Assay (Invitrogen, USA) on an Appliskan microplate  
530 reader (Thermo Fisher Scientific, USA) and diluted to 10 ng DNA  $\mu\text{l}^{-1}$ . Each PCR reaction was  
531 performed in a 8.2  $\mu\text{l}$  total volume containing 2.6  $\mu\text{l}$  @ 10 ng  $\mu\text{l}^{-1}$  fungal DNA template, 0.0625  
532  $\mu\text{M}$  M13 primer fluorescently labeled with one of FAM, VIC, NED, PET or LIZ (Applied Bio-  
533 Systems), 0.67  $\mu\text{M}$  of each of forward (with M13 tail) and reverse primer, and 4.1  $\mu\text{l}$  of FidelityTaq  
534 PCR master mix (FidelityTaq 2x, 25 mM  $\text{MgCl}_2$ , 20 mM dNTPs). PCR run conditions were  
535 optimized for BioRad DNA Engine Dyad (BIO-RAD, USA) resulting in the following amplification  
536 conditions: 94°C for 3 min, then 22 cycles at 94°C for 30 s, 56°C for 30 s, 72°C for 45 s,  
537 followed by additional 22 cycles of at 94°C for 10 s, 56°C for 20 s, 72°C for 1 min; with a final  
538 extension of 10 min at 72°C. PCR reactions for each dye were pooled, and 3  $\mu\text{l}$  of each pooled  
539 aliquot were mixed with 7  $\mu\text{l}$  formamide plus size standards, denatured at 95°C for 5 min, and  
540 ice chilled. Fluorescent capillary electrophoresis was run on an ABI 3730xl DNA Analyzer  
541 (Applied Biosystems, USA).

542  
543 Initially, the quality of each primer pair was examined by gel electrophoresis of PCR  
544 amplification products from a sub-set of eight *S. sclerotiorum* isolates (data not shown). Eight  
545 SSRs were eliminated due to poor performance: ssr 7-2, ssr 7-3, ssr 17-3, ssr 20-3, ssr 110-4,  
546 ssr 114-4, AAFC-2b and AAFC-2d. Subsequently, 30 AAFC and 9 ssr primers were used to  
547 genotype 127 *S. sclerotiorum* isolates. Fragment size analyses were performed using  
548 Genographer 2.1.4 [39]. Size differences of one or more base pairs were considered separate  
549 SSR alleles. The size estimation at hyper variable loci with more than 20 different alleles were  
550 carried out manually. All possible alleles were determined for each SSR locus and a matrix was  
551 generated indicating the presence (1), absence (0) or no amplification (null) of each allele in all  
552 127 isolates. Only unambiguous data with >80% amplification success rate were included in the  
553 final data set.

554



## 555 **Analysis of genomic diversity**

556 The Genographer dataset was curated into Excel (Microsoft, USA). Allele counts, including total  
557 number of polymorphic alleles, shared and private alleles, were conducted in the Microsatellite  
558 feature of the Toolkit program [40]. The polymorphic information content (PIC) value for each  
559 primer pair across isolates was calculated using the GenAIEEx 6.5 feature in Excel [41].  
560 Genomic diversity ( $H$ ) was calculated in POPGENE 1.32 [42]. The haplotype was determined  
561 for individual isolates combining alleles across all loci using FaBox 1.41 [43] (data not shown).

562  
563 The SSR data were grouped into the three provinces, Alberta, Saskatchewan and Manitoba,  
564 where the isolates were collected and used for several types of analyses. Contribution of isolate  
565 and geographical location to genomic variation was determined by analysis of molecular  
566 variance (AMOVA) using GenAlex v 6.5 with 999 permutations, and the results presented in  
567 Table 3. Analysis of allelic richness and private allele richness among isolates within each  
568 province was carried out using the software ADZE 1.0 with the rarefaction approach where  
569 sample size was equal to the smallest sample size [44] (Table 4). Analyses of gene flow ( $Nm$ ),  
570 Nei's unbiased genetic distance ( $D$ ), population differentiation ( $PhiPT$ ) for pairwise comparison  
571 of provinces were calculated using GenAlex 6.5 in Excel with 999 permutations [41] (Table 5).  
572 Two analyses of linkage disequilibrium ( $LD$ ) were used to test the null hypothesis that random  
573 recombination exists. For this, the index of association ( $I_A$ ) and the standardized index of  
574 association ( $rBarD$ ) were calculated using the software Multilocus v.1.31 [45] for each province  
575 and the three provinces combined (Table 6). The null hypothesis was tested by comparing  
576 expected and observed values with 1000 permutations; so that if  $rBarD$  equal 0 there was a  
577 non-random association of alleles, whereas  $rBarD$  equal 1 specify random association of alleles.

578

## 579 **Examination of population structure**

580 A Bayesian cluster analysis was used to infer genomic ancestry among the 127 *S. sclerotiorum*  
581 isolates using Structure [46]. Analyses with the number of sub-populations ranging from  $K = 2$   
582 to  $K = 24$  were performed using Markov Chain Monte Carlo replication method. The admixture  
583 ancestry and independent allele frequency options were used throughout. The number of sub-  
584 populations among isolates was determined using the Evanno method and  $\ln(P)$  was graphed in  
585 Structure Harvester, a web-based program that visualizes output data from Structure [47]. The  
586 resulting Delta K values are graphed in Fig 4.

587

588 The relative genomic distance among *S. sclerotiorum* isolates based on SSR polymorphisms  
589 was analyzed using NTSYSpc 2.2 with matrices of genetic distance coefficient function  
590 'SIMGEND' sub-program with Nei72 [48]. Subsequently, neighbour-joining analysis (Njoin) was  
591 performed with default parameters. To visualize the results, the 'TREE' function was used to  
592 generate a phylogenetic tree, where the oldest isolate, 321 collected in 1992, was selected as  
593 the root and branches consisted of all other isolates collected in 2010 (Fig 5).

594

### 595 **Evaluation of aggressiveness**

596 Based on analyses of population structure (Delta K) and the phylogenetic tree, 17 *S.*  
597 *sclerotiorum* sub-populations were selected to represent the genomic diversity in western  
598 Canada. One isolate from each sub-population was selected for evaluation of aggressiveness  
599 so that each province was represented by five to six isolates as follows: Alberta isolates AB3,  
600 AB7, AB19, AB29 and 321; Saskatchewan isolates SK14, SK23, SK35, SK38, SK44 and SK45;  
601 and Manitoba isolates MB21, MB35, MB51, MB52, MB57 and MB61. The isolates were  
602 inoculated onto six *B. napus* lines that were selected based on their phenotypic reaction to a  
603 single *S. sclerotiorum* isolate, 321 [11]. These lines were PAK54 and PAK93 (Pakistan), DC21  
604 (South Korea), K22 (Japan), with high level of quantitative resistance, variety Tanto (France)  
605 with intermediate resistance and variety Topas (Sweden) as a susceptible control.

606

607 Seeds of each line were sown into water-soaked peat pellets (Jiffy-7, McKenzie, Brandon, MB,  
608 Canada) and placed in a greenhouse. Plants at the 3-4 leaf stage were transplanted into natural  
609 soil in a phenotyping facility under semi-field conditions. The facility consisted of a 20 m x 40 m  
610 greenhouse structure with retractable roof and side walls made from reinforced polyethylene  
611 supported by permanent gable ends of corrugated polyvinyl (Cravo, Brantford, ON, Canada).  
612 Plant growth relied on ambient sun light and temperature with rainfall supplement with overhead  
613 irrigation when needed. A weather sensor and computer program operated motors that closed  
614 the roof and side walls to protect the plants at temperatures below 10°C and wind speeds above  
615 30 km per hour. At temperatures above 25°C the plants were cooled by activation of an  
616 overhead misting system and shaded by closing the roof 50%.

617

618 Stocks of the 17 isolates were produced by inoculating the susceptible canola variety Topas  
619 with each isolate and re-isolating the pathogen onto nutrient rich V8 juice media (200 ml V8  
620 juice, 0.75 g CaCO<sub>3</sub>, 800 ml water, 15.0 g agar). After 4-6 days, 7 mm plugs of mycelium were  
621 transferred to cryo-freezer solution (10% skim milk, 40% glycerol) and stored at -80°C until  
622 needed for inoculation. Inoculum of individual isolates was prepared by transferring mycelium  
623 plugs from the cryo-freezer onto PDA plates. The plates were incubated in a cycle of 16 h day  
624 (22 ±1°C) and 8 h night (18 ±1°C), and were ready for inoculation after 4-5 days at which point  
625 the culture was still actively growing, but had not reached the edge of the Petri plate. Mycelium  
626 plugs were cut with a 7 mm cork borer from the margin of actively growing cultures and placed  
627 on 3 x 7 cm pieces of stretched Parafilm (Bemis Company Inc, Oshkosh, WI, USA) with the  
628 mycelium facing up. When each plant was at full flower, two internodes of the main stem were  
629 inoculated by attaching a mycelium plug with Parafilm as described by Gyawali et al. (11). The  
630 length of the developing lesions was measured at 7, 14 and 21 days after inoculation (dai), and  
631 subsequently used to calculate the area under the disease progress curve (AUDPC). In

632 addition, depth of penetration into the stem tissue was assessed as either firm, soft or collapsed  
633 and used to calculate percent soft + collapsed lesions for each isolate and line. The experiment  
634 consisted of six *B. napus* lines in four replications planted as the main plot, with the 17 *S.*  
635 *sclerotiorum* isolates inoculated onto plants as sub-plots organized in a randomized complete  
636 block design (RCBD). There were seven plants in each sub-plot for a total of 2,856 plants. The  
637 mean values for each combination of *S. sclerotiorum* isolate and *B. napus* line were calculated  
638 for the five disease traits (7 dai, 14 dai, 21 dai, AUDPC and % soft + collapsed lesions).  
639 Correlations between these traits were analysed in a pairwise manner using the Pearson  
640 correlation coefficient (PROC CORR) in SAS Enterprise 5.1. The result showed all traits were  
641 highly correlated (S2 Table). For simplicity, only stem lesion length measured at 21 dai are  
642 presented here. Analysis of variance (ANOVA) was conducted using the PROC GLM model in  
643 SAS Enterprise 5.1 to determine variation explained by isolate, *B. napus* line, and the  
644 interaction between isolate and *B. napus* line (Table 7), followed by calculation of the least  
645 significance difference (LSD) between entries (S3 and S4 Tables).

646

## 647 **Acknowledgement**

648 Creation of the map of *S. sclerotiorum* sample locations by Cam G Kenny is greatly appreciated.

649

## 650 **References**

- 651 1. Lumsden RD, Wergin WP (1980) Scanning-Electron Microscopy of Infection of Bean by  
652 Species of Sclerotinia, Mycologia, 72:6, 1200-1209, DOI: 10.1080/00275514.1980.12021302
- 653
- 654 2. Kohn LM, Carbone I, Anderson JB (1990) Mycelial interactions in *Sclerotinia sclerotiorum*.  
655 Experimental Mycology, 14 (3): 255-267. doi.org/10.1016/0147-5975(90)90023-M.

656

- 657 3. Ford EJ, Miller RV, Gray H, Sherwood JE (1995) Heterokaryon and vegetative compatability  
658 in *Sclerotinia sclerotiorum*. Mycol Res. 99(2):241-247.  
659
- 660 4. Sirjusingh C, Kohn LM (2001) Characterization of microsatellites in the fungal plant pathogen,  
661 *Sclerotinia sclerotiorum*. Molecular Ecology Notes 1(4):267-269 doi:10.1046/j.1471-  
662 8278.2001.00102.x.  
663
- 664 5. Ge XT, Li YP, Wan ZJ, You MP, Finnegan PM, Banga SS, Sandhu PS, Garg H, Salisbury  
665 PA, Barbetti MJ (2012) Delineation of *Sclerotinia sclerotiorum* pathotypes using differential  
666 resistance responses on *Brassica napus* and *B. juncea* genotypes enables identification of  
667 resistance to prevailing pathotypes. Field Crops Research, 127:248-258.  
668 <https://doi.org/10.1016/j.fcr.2011.11.022>.  
669
- 670 6. Clarkson JP, Coventry E, Kitchen J, Carter HE, Whipps JM (2013) Population structure of  
671 *Sclerotinia sclerotiorum* in crop and wild hosts in the UK. Plant Pathology 62(2):309-324  
672 doi:10.1111/j.1365-3059.2012.02635.x.  
673
- 674 7. Taylor A, Coventry E, Jones JE, Clarkson JP (2015) Resistance to a highly aggressive isolate  
675 of *Sclerotinia sclerotiorum* in a *Brassica napus* diversity set. Plant Pathology 64:932-940. n/a-  
676 n/a doi:10.1111/ppa.12327.  
677
- 678 8. Petrofeza S, Nasser LCB (2012) Case study: *Sclerotinia sclerotiorum*: Genetic diversity and  
679 disease control. The molecular basis of plant genetic diversity. Caliskan M. (Ed). ISBN: 978-  
680 953-51-0157-4.  
681

- 682 9. Bolton MD, Thomma BPHJ, Nelson BD (2006) *Sclerotinia sclerotiorum* (Lib.) de Bary: biology  
683 and molecular traits of a cosmopolitan pathogen. *Molecular Plant Pathology* 7(1): 1-16. DOI:  
684 10.1111/J.1364-3703.2005.00316.X.  
685
- 686 10. Bradley CA, Henson RA, Porter PM, LeGare DG, del Río LE, Khot SD (2006) Response of  
687 canola cultivars to *Sclerotinia sclerotiorum* in controlled and field environments. *Plant Disease*  
688 90(2):215-219 doi:10.1094/PD-90-0215.  
689
- 690 11. Gyawali S, Harrington M, Durkin J, Horner K, Parkin IAP, Hegedus DD, Bekkaoui D,  
691 Buchwaldt L (2016) Microsatellite markers used for genome-wide association mapping of partial  
692 resistance to *Sclerotinia sclerotiorum* in a world collection of *Brassica napus*. *Mol Breed.* 2016,  
693 36: 72. doi: 10.1007/s11032-016-0496-5.  
694
- 695 12. Kohli Y, Brunner LJ, Yoell H, Milgroom MG, Anderson JB, Morrall RAA, Kohn LM (1995)  
696 Clonal dispersal and spatial mixing in populations of the plant pathogenic fungus, *Sclerotinia*  
697 *sclerotiorum*. *Molecular Ecology* 4(1):69-77 doi:10.1111/j.1365-294X.1995.tb00193.x.  
698
- 699 13. Amselem J, Cuomo CA, van Kan JA, Viaud M, Benito EP, Couloux A, Coutinho PM, de  
700 Vries RP, Dyer PS, Fillinger et al. (2011) Genomic analysis of the necrotrophic fungal  
701 pathogens *Sclerotinia sclerotiorum* and *Botrytis cinerea*. *PLoS Genet* 7(8):e1002230  
702 doi:10.1371/journal.pgen.1002230.  
703
- 704 14. Wong JAL, Willets HJ (1979) Cytology of *Sclerotinia sclerotiorum* and related species.  
705 *Journal of General Microbiology* 112:29-34.  
706

- 707 15. Uhm JY, Fuji H (1986) Course of meiosis in *Sclerotinia sclerotiorum* and related species.  
708 Trans. Mycol Soc Japan 27:129-141.  
709
- 710 16. Calonge FD (1970) Notes on the ultrastructure of the microconidium and stroma in  
711 *Sclerotinia sclerotiorum*. Arch. Mikrobiol. 71:191-195.  
712
- 713 17. Kosasih BD, Willetts HJ (1975) Ontogenetic and histochemical studies of the apothecium of  
714 *Sclerotinia sclerotiorum*, Annals of Botany, Volume 39:185–191.  
715 <https://doi.org/10.1093/oxfordjournals.aob.a084928>  
716
- 717 18. Ekins M (1999) Genetic diversity in *Sclerotinia* species. Thesis. Department of Botany, The  
718 University of Queensland, Australia. Pp. 202.  
719
- 720 19. Monahan WB, Pereira RJ, Wake DB (2012) Ring distributions leading to species formation:  
721 a global topographic analysis of geographic barriers associated with ring species. BMC Biol 10,  
722 20. <https://doi.org/10.1186/1741-7007-10-20>.  
723
- 724 20. Hemmati R, Javan-Nikkhah M, Lind C (2009) Population genetic structure of *Sclerotinia*  
725 *sclerotiorum* on canola in Iran. European Journal of Plant Pathology 125(4):617-628  
726 doi:10.1007/s10658-009-9510-7.  
727
- 728 21. Sexton AC, Whitten AR, Howlett BJ (2006) Population structure of *Sclerotinia sclerotiorum*  
729 in an Australian canola field at flowering and stem-infection stages of the disease cycle.  
730 Genome 49(11):1408-15 doi:10.1139/g06-101.  
731

- 732 22. Attanayake RN, Carter PA, Jiang D, Del Rio-Mendoza, Chen W (2013) *Sclerotinia*  
733 *sclerotiorum* populations infecting canola from China and the United States are genetically and  
734 phenotypically distinct. *Phytopathology* 103(7):750-61 doi:10.1094/phyto-07-12-0159r.  
735
- 736 23. Zancan WLA, Steadman JR, Higgins R, Jhala R, da Cruz Machado J (2015) Genetic and  
737 aggressiveness variation among *Sclerotinia sclerotiorum* dry bean isolates from Brazil fields.  
738 *Biosci. J.*, Uberlândia, 31 (4):1143-1151.  
739
- 740 24. Lehner MS, Paula Junior TJ, Hora Junior BT, Teixeirab H, Vieirab RF, Carneirod JES,  
741 Mizubutic ESG (2015) Low genetic variability in *Sclerotinia sclerotiorum* populations from  
742 common bean fields in Minas Gerais State, Brazil, at regional, local and micro-scales. *Plant*  
743 *Pathology* 64:921-931.  
744
- 745 25. Atallah Z, Larget B, Chen X, Johnson D (2004) High genetic diversity, phenotypic uniformity,  
746 and evidence of outcrossing in *Sclerotinia sclerotiorum* in the Columbia Basin of Washington  
747 State. *Phytopathology* 94(7):737-742.  
748
- 749 26. Pannullo A, Kamvar ZN, Miorini TJJ, Steadman JR, Everhart SE (2019) Genetic variation  
750 and structure of *Sclerotinia sclerotiorum* populations from soybean in Brazil. *Tropical Plant*  
751 *Pathology* 44:53-64.  
752
- 753 27. Aldrich-Wolfe L, Travers S, Nelson BD Jr (2015) Genetic variation of *Sclerotinia sclerotiorum*  
754 from multiple crops in the North Central United States. *PLoS One*. 29,10(9): e0139188. doi:  
755 10.1371/journal.pone.0139188.  
756



- 757 28. Lehner MS, de Paula Junior T, Del Ponte EM, Mizubuti ESG, Pethybridge SJ (2017)  
758 Independently founded populations of *Sclerotinia sclerotiorum* from a tropical and a temperate  
759 region have similar genetic structure. PLOS ONE DOI:10.1371/journal.pone.0139188.  
760
- 761 29. Willbur JF, Ding S, Marks ME, Lucas H, Grau CR, Groves CL, Kabbage M, Smith DL (2017)  
762 Comprehensive sclerotinia stem rot screening of soybean germplasm requires multiple isolates  
763 of *Sclerotinia sclerotiorum*. Plant Disease, 101:344-353.  
764
- 765 30. Lehner MS, Paula Junior TJ, Vieirab RF, Lima RC, Soares BA, Silva RA (2016) Reaction of  
766 sources of resistance to white mold to microsatellite haplotypes of *Sclerotinia sclerotiorum*. Sci.  
767 Agric. 73:184-188.  
768
- 769 31. Davar R, Darvishzadeh R, Majd A (2011) Genotype-isolate interaction for resistance to  
770 *Sclerotinia sclerotiorum* in sunflower. Phytopathologia Mediterranea 50:442-449.  
771
- 772 32. Akem C, Bellar M, Bayaa, B (2006) Comparative growth and pathogenicity of geographical  
773 isolates of *Sclerotinia sclerotiorum* on lentil genotypes. Plant Pathology Journal 5:67-71.  
774
- 775 33. Denton-Giles M, Derbyshire MC, Khentry Y, Buchwaldt L, Kamphuis LG (2018) Partial stem  
776 resistance in *Brassica napus* to highly aggressive and genetically diverse *Sclerotinia*  
777 *sclerotiorum* isolates from Australia. Can J Plant Path 40(4): 551-561.  
778 doi.org/10.1080/07060661.2018.1516699.  
779
- 780 34. Lumsden RD (1979) Histology and physiology of pathogenesis in plant diseases caused by  
781 *Sclerotinia* species. Phytopathology, 69:890–896.  
782

- 783 35. Badet T, Peyraud R, Mbengue M, Navaud O, Derbyshire M, Oliver RP, Barbacci A, Raffaele  
784 S (2017) Codon optimization underpins generalist parasitism in fungi. *eLife* 2017;6:e22472 doi:  
785 10.7554/eLife.22472  
786
- 787 36. Derbyshire MC, Denton-Giles M, Hane JK, Chang S, Mousavi-Derazmahalleh M, Raffaele  
788 S, Buchwaldt L, Kamphuis LG (2019) A whole genome scan of SNP data suggests a lack of  
789 abundant hard selective sweeps in the genome of the broad host range plant pathogenic fungus  
790 *Sclerotinia sclerotiorum*. <https://doi.org/10.1371/journal.pone.0214201>.  
791
- 792 37. Shafer MR, Kohn LM (2006) A optimized method for mycelium compatibility testing in  
793 *Sclerotinia sclerotiorum*. *Mycologia* 98(4): 593-597.  
794
- 795 38. Benham J, Jeung JU, Jasieniuk M, Kanazin V, Blake T (1999) Genographer: a graphical tool  
796 for automated fluorescent AFLP and microsatellite analysis. *Journal of Agricultural Genomics*  
797 4:1-3.  
798
- 799 39. Martins WS, Soares Lucas DC, de Souza Neves KF, Bertioli DJ (2009) WebSat - A web  
800 software for microsatellite marker development. *Bioinformatics* 3(6):282-283.  
801
- 802 40. Park SDE (2008) Excel microsatellite Toolkit. Computer program and documentation  
803 distributed by the author.  
804
- 805 41. Peakall R, Smouse PE (2012) GenAIEx 6.5: genetic analysis in Excel. Population genetic  
806 software for teaching and research-an update. *Bioinformatics* 28(19):2537-9  
807 doi:10.1093/bioinformatics/bts460.  
808

- 809 42. Yeh FC, Yang RC, Boyle TB, Ye Z, Mao JX (1997) POPGENE, the user-friendly shareware  
810 for population genetic analysis. <https://sites.ualberta.ca/~fyeh/popgene.pdf>.  
811
- 812 43. Villesen P (2007) FaBox: an online toolbox for fasta sequences. *Molecular Ecology Notes*  
813 7(6):965-968 doi:10.1111/j.1471-8286.2007.01821.x.  
814
- 815 44. Szpiech ZA, Jakobsson M, Rosenberg NA (2008) ADZE: a rarefaction approach for counting  
816 alleles private to combinations of populations. *Bioinformatics* 24(21):2498-504  
817 doi:10.1093/bioinformatics/btn478.  
818
- 819 45. Agapow PM, Burt A (2001) Indices of multilocus linkage disequilibrium. *Molecular Ecology*  
820 *Notes* 1(1-2):101-102 doi:10.1046/j.1471-8278.2000.00014.x.  
821
- 822 46 Pritchard JK, Matthew S, Donnelly P (2000) Inference of Population Structure Using  
823 Multilocus Genotype Data. *Genetics* 155:945-59.  
824
- 825 47. Earl D, vonHoldt B (2012) Structure Harvester: a website and program for visualizing  
826 STRUCTURE output and implementing the Evanno method. *Conservation Genetics Resources*  
827 4(2):359-361 doi:10.1007/s12686-011-9548-7.  
828

## 829 **Supporting Information**

- 830 **S1 Table.** Mycelial compatibility scoring matrix by Province, inter-Province and single field.  
831 **S2 to S5 Tables.** Correlation among disease traits in tests of aggressiveness. Average  
832 aggressiveness by isolate. Average aggressiveness by line. Standard Error for all comparisons.  
833 **S6 Fig.** Map of canola production areas in western Canada.

834 **S7 Table.** *Sclerotinia sclerotiorum* sample locations, isolate names, Q1 and Q2 values from  
835 population structure analysis.

836

## 837 **Author Contributions**

838 LB conceived and lead the research and wrote the manuscript. LB and DDH secured funding.

839 AD collected isolates. HG designed primers and amplified SSRs. AS and KKG sequenced SSR

840 products. KDP and JD performed statistical analysis. JA, MH, DL, AD and HG performed tests

841 of mycelium compatibility and aggressiveness. All authors reviewed the manuscript.

842

## 843 **Figure legends**

844 **Fig 1. Geographical locations of commercial canola fields where *S. sclerotiorum* isolates**

845 **were collected.** A disease survey and isolate collection was carried out in 2010 across three

846 Canadian Provinces. The sites closely resemble the distribution of canola producing areas (S6

847 Figure). A single isolate, 321, was collected in 1992.

848 **Fig 2. Mycelium compatibility among *S. sclerotiorum* isolates from canola fields in**

849 **Manitoba.** Coloured circles show mutually compatible isolates, and arrows show compatibility

850 between two isolates. Table S1 contains all isolate by isolate scoring matrixes.

851

852 **Fig 3. Mycelium compatibility among *S. sclerotiorum* isolates from canola fields in**

853 **Saskatchewan, Alberta, a single field, and inter-Province.** Coloured circles show clones of

854 mutually compatible isolates, and arrows show compatibility between two isolates. Table S1

855 contains all isolate by isolate scoring matrixes.

856

857 **Fig 4. Likely number of sub-populations in *S. sclerotiorum* based on polymorphisms at**

858 **39 simple sequence repeat loci.** The number of sub-populations among 127 isolates was

859 determined using the Evanno method and graphed in Structure Harvester, a web-based  
860 program that visualizes output data from Structure (47).

861

862 **Fig 5. Phylogenetic tree of the relationship among 127 *S. sclerotiorum* isolates based on**  
863 **polymorphisms at 39 simple sequence repeat loci.** Sub-populations are marked from 1 to 17  
864 and coloured in alternate blue and red. The star shows one isolate from each sub-cluster  
865 selected for evaluation of aggressiveness.

866

867 **Fig 6. Results from evaluation of 17 *S. sclerotiorum* isolates for aggressiveness on six *B.***  
868 ***napus* lines.** Plants at full flower were inoculated by attaching a mycelium plug to the main  
869 stem with Parafilm. The average stem lesion length 21 days after inoculation is shown. For  
870 clarity, the standard error bar is only shown for susceptible Topas and resistant PAK54 (S5 has  
871 all standard errors).

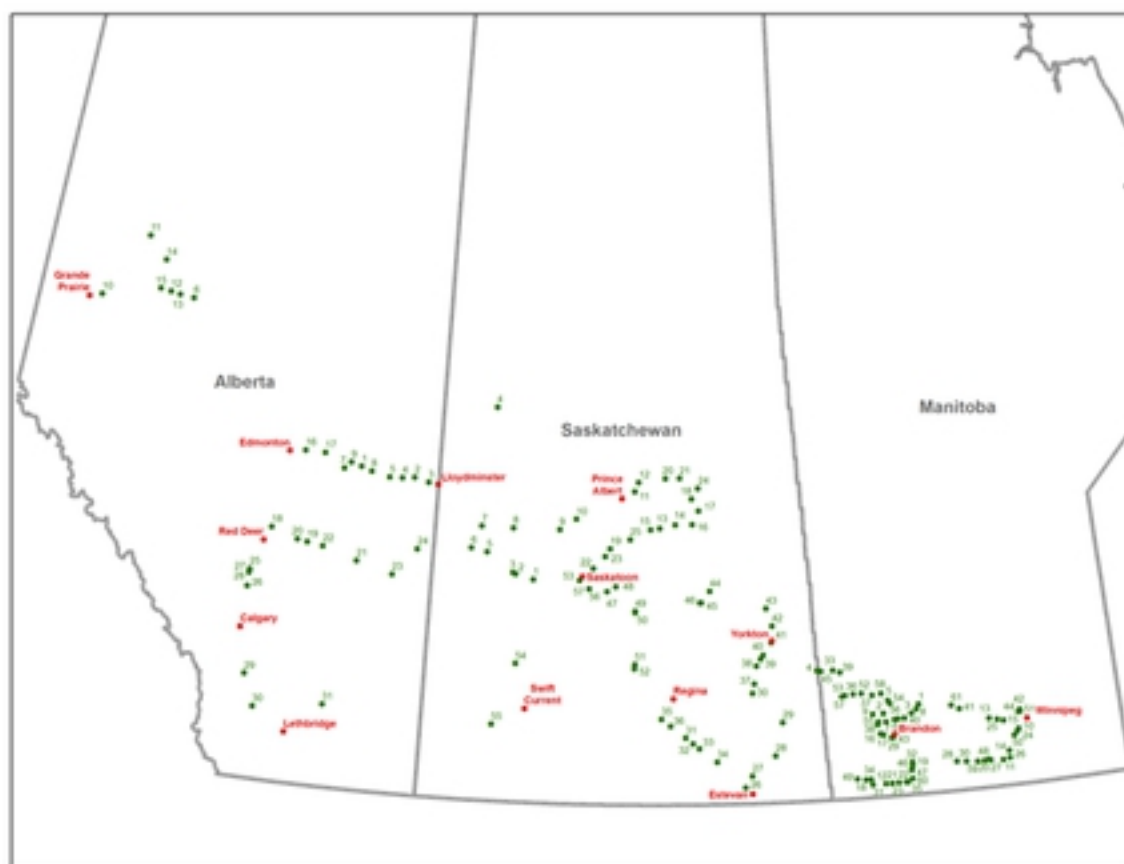

**Figure 1.** Geographical locations of commercial canola fields where *S. sclerotiorum* isolates were collected in three Canadian provinces in 2010.

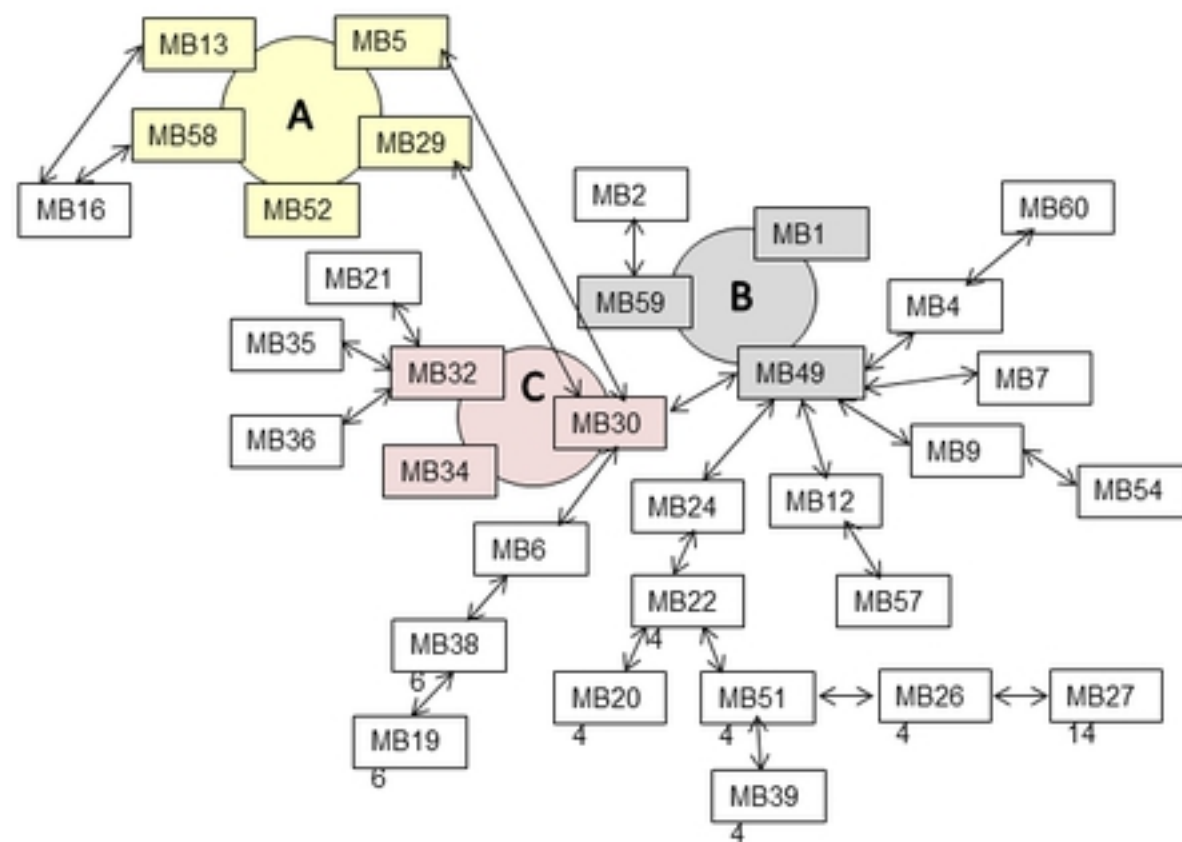

**Figure 2.** Mycelium compatibility among *S. sclerotiorum* isolates in Manitoba.

Figure

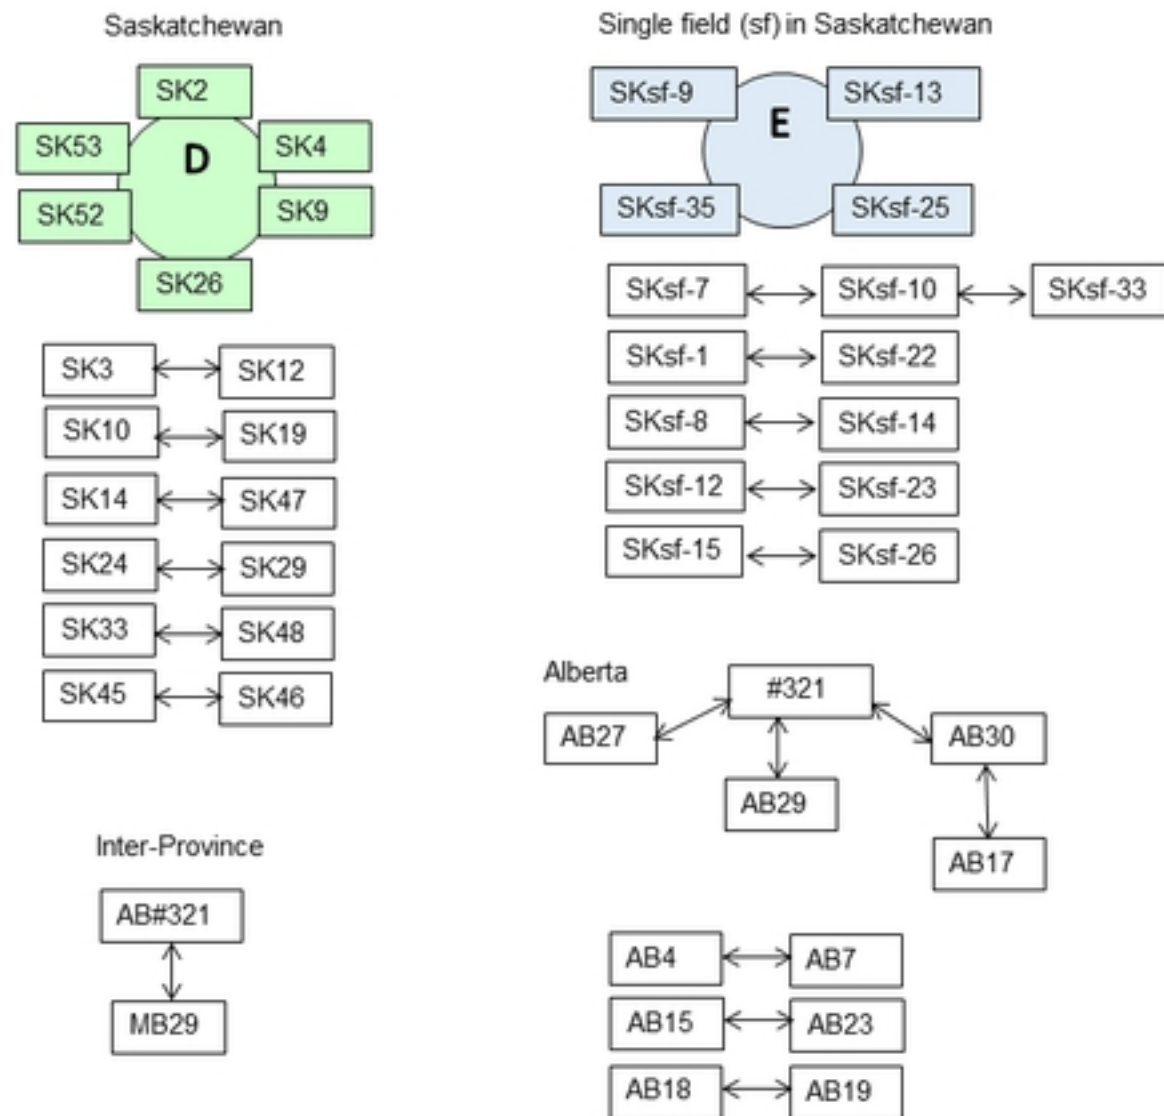

**Figure 3.** Mycelium compatibility among *S. sclerotiorum* isolates from Saskatchewan, Alberta, inter-Province and a single field in Saskatchewan.



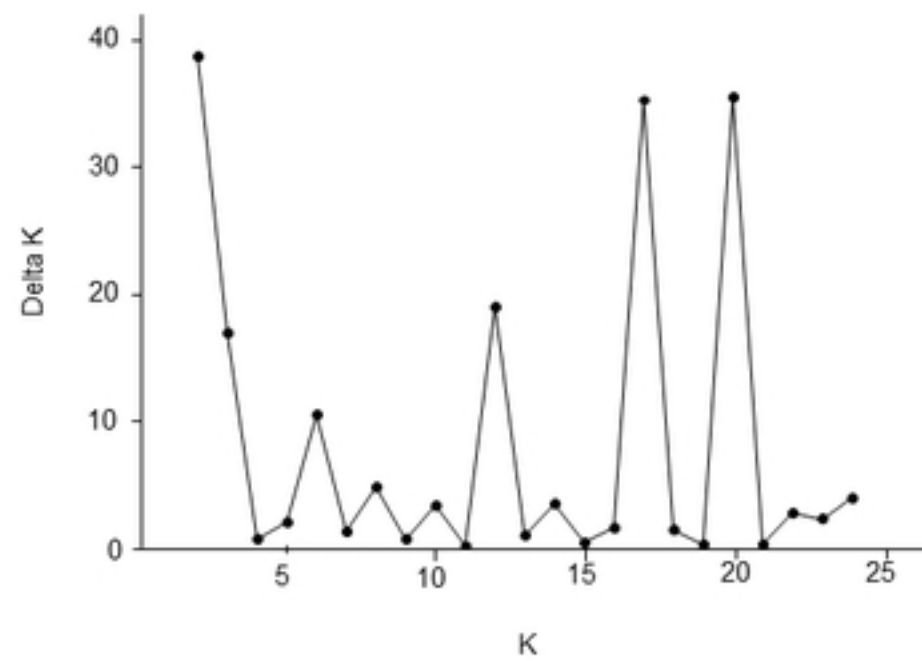

Figure 4. Delta K for sub-populations 2 to 24

Figure

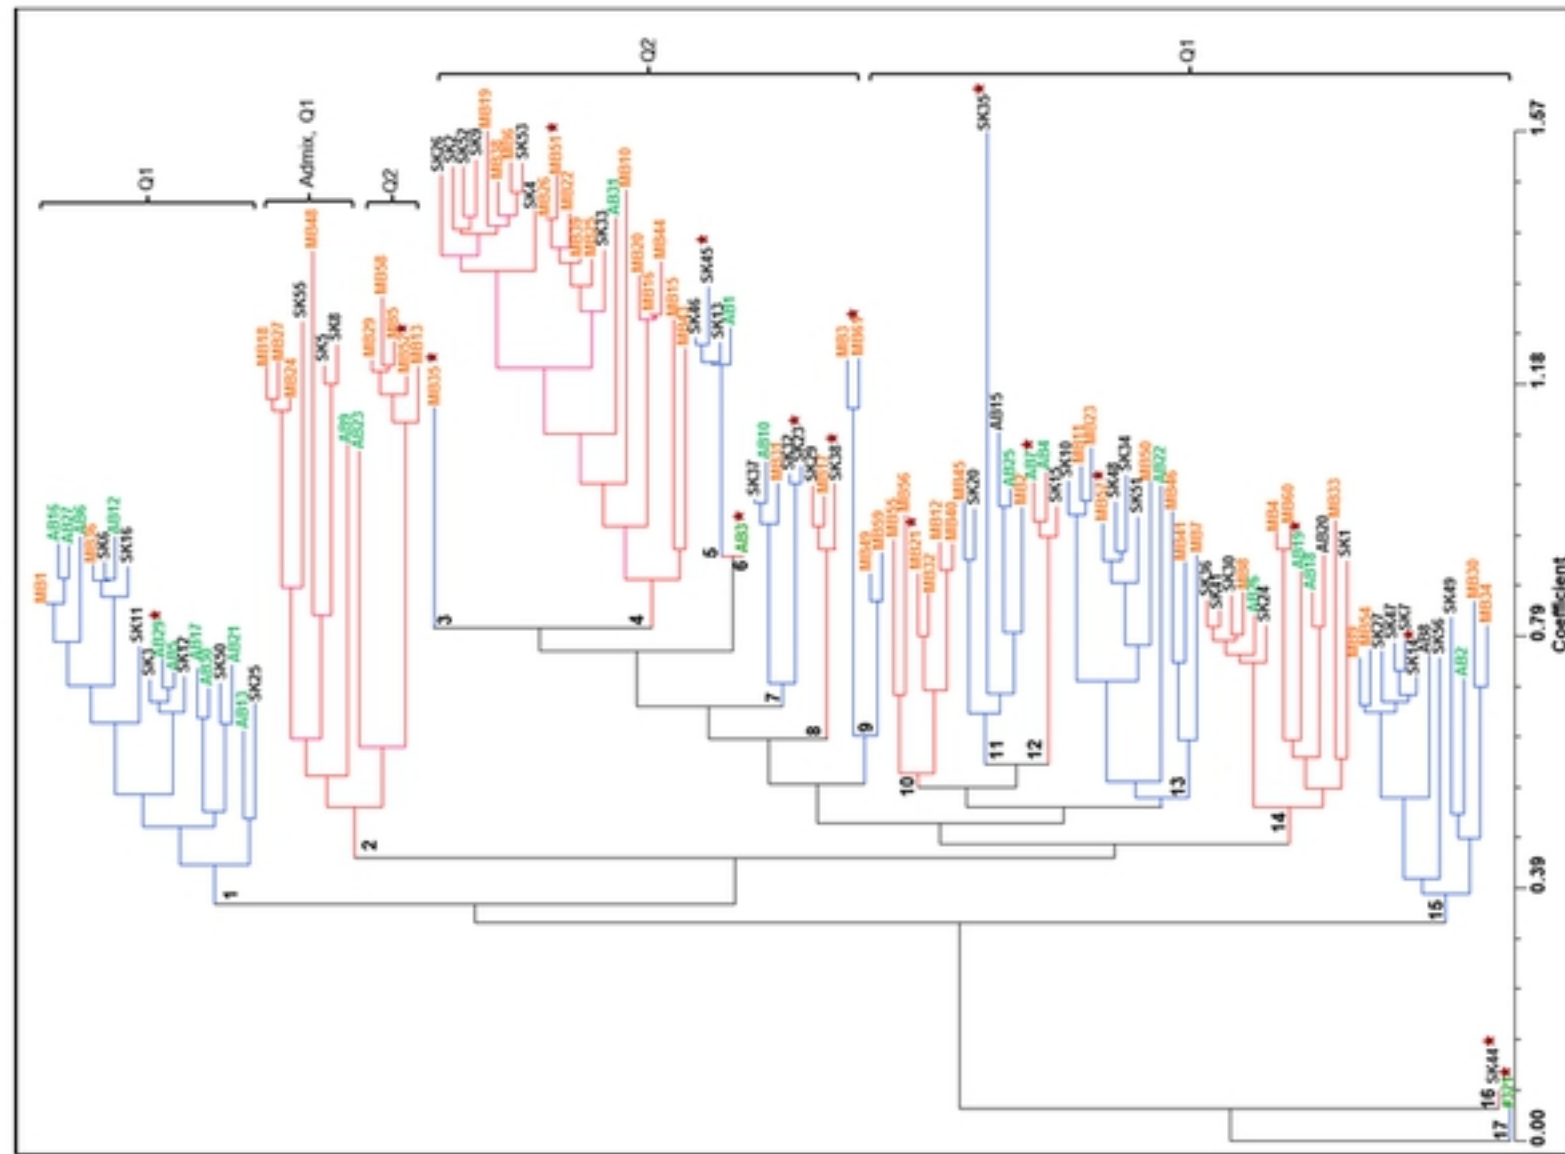

Figure 5. Phylogenetic tree of *S. sclerotiorum* isolates with Q-grouping

Figure

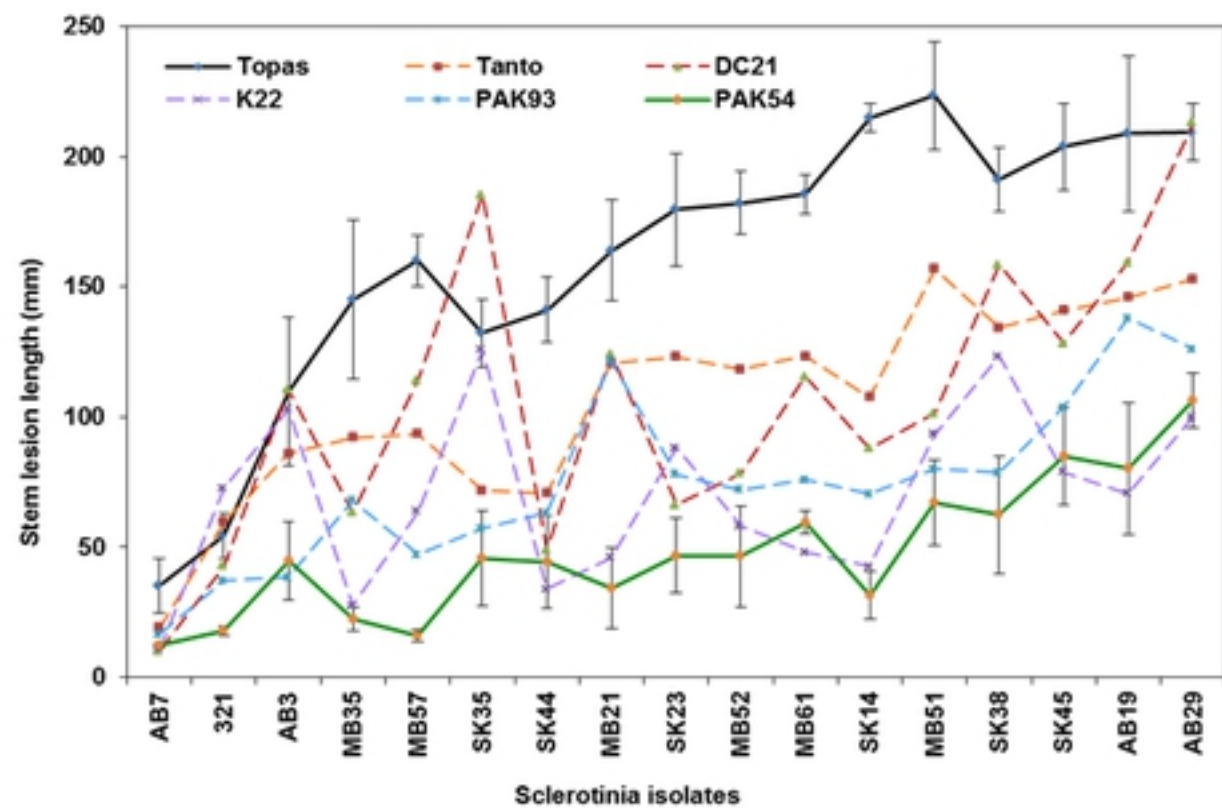

Figure 6. Aggressiveness test of 17 *S. sclerotiorum* isolates on six *B. napus* lines.

Figure
